# Supplementary material
Source: Springer Nature journal article supplement (https://www.springermedizin.de/resource/supplementary/12875_2010_479_MOESM2_ESM.pdf/9434704)
Supplement: MOESM2 [file 9434704]

## **Group Session 1 (weeks 3-4)**

### **Introduction**

- Healthy lifestyle targets
- Readiness to change
- Goal setting
- Self-monitoring
- Dealing with lapses
- Pedometer and group walk

## **Group Session 2 (weeks 5-6)**

### **Nutrition**

- Healthy eating principles
- Energy balance
- Cooking and eating out
- Group resistance exercise

## **Group Session 3 (weeks 7-8)**

### **Food Labels and Active Living**

- Shopping & nutrition label reading
- Barriers to physical activity
- Physical activity and strategies
- Local physical activity options
- Group walk

## **Group Session 4 (weeks 10-12)**

### **Eating Behaviours**

- Review of changes
- Trigger to eating & behavioural management
- Social pressures
- Reshaping negative thoughts
- Maintaining changes and lapse management

## **Review sessions 5 & 6 (6 & 9 months)**

- Review of changes and sharing of experiences
- Relapse management
